# Supplementary material
Source: publisher site journal article supplement (https://www.spandidos-publications.com/6472/downloadSupplementary)
Supplement: Supplementary file 1 [file downloadSupplementary]

**Table S1.** Primer sequences of RT-qPCR.

| Antibody           | Forward (5'-3')         | Reverse (5'-3')        |
|--------------------|-------------------------|------------------------|
| Mouse <i>Actb</i>  | TGAGCTGCGTTTTACACCCT    | GCCTTCACCGTTCCAGTTTT   |
| Mouse <i>Il6</i>   | TTCTTGGGACTGATGCTGGT    | CTGTGAAGTCTCCTCTCCGG   |
| Mouse <i>Tnfa</i>  | TGAGGTCAATCTGCCCAAGT    | GGGGTCAGAGTAAAGGGGTC   |
| Mouse <i>Il10</i>  | AGGCGCTGTCATCGATTCT     | ATGGCCTGTAGACACCTTGG   |
| Mouse <i>Il1β</i>  | GCAACTGTTCCCTGAACTCAACT | ATCTTTTGGGGTCCGTCAACT  |
| Mouse <i>Nos2</i>  | CCCTTCAATGGTTGGTACATGG  | ACATTGATCTCCGTGACAGCC  |
| Mouse <i>Arg1</i>  | GCAGTTGGAAGCATCTCTGG    | GAGAAAGGACACAGGTTGCC   |
| Human <i>Gapdh</i> | GGACCTGACCTGCCGTCTAG    | GTAGCCCAGGATGCCCTTGA   |
| Human <i>IL6</i>   | GGGCTCTTCGGCAAATGTAG    | TGCCCAGTGGACAGGTTTCT   |
| Human <i>TNFα</i>  | GAGGCCAAGCCCTGGTATG     | CGGGCCGATTGATCTCAGC    |
| Human <i>IL10</i>  | GACTTTAAGGGTTACCTGGGTT  | GTCACATGCGCCTTGATGTCTG |
| Human <i>IL1β</i>  | ATGGCTTATTACAGTGGCA     | TAGTGGTGGTCCGAGATT     |
| Human <i>NOS2</i>  | TGACCTCCTAACAAGTAGCACC  | CAAGTCCATCTTTCACCCAC   |
| Human <i>ARG1</i>  | CTCAAAGGGACAGCCACGAG    | TAGGGATGTCAGCAAAGGGC   |

IL, interleukin; TNF $\alpha$ , tumor necrosis factor  $\alpha$ ; NOS2, nitric oxide synthase 2; ARG1, arginase 1; GAPDH, glyceraldehyde-3-phosphate dehydrogenase.

**Table SIII.** OPLS-DA analysis between the three groups.

| Group                      | R2X   | R2Y   | Q2    | P-value |
|----------------------------|-------|-------|-------|---------|
| Healthy vs non-infection   | 0.504 | 0.530 | 0.296 | <0.01   |
| Healthy vs infection       | 0.423 | 0.723 | 0.663 | <0.01   |
| Non-infection vs infection | 0.394 | 0.360 | 0.207 | <0.05   |

R2X, X-axis cumulative interpretation rate; R2Y, Y-axis cumulative interpretation rate; Q2, prediction rate; OPLS-DA, orthogonal partial least squares discriminant analysis.
